# Supplementary material for: Towards functional verifying a family of systemC TLMs
Source: Springer Nature journal article supplement (doi:10.1007/s11704-018-8254-y), 2019-03-07
Supplement: 11704_2018_8254_MOESM1_ESM.pdf [file 11704_2018_8254_MOESM1_ESM.pdf]

# Toward functional verifying a family of systemC TLMs

**Tun LI, Jun YE, Qingping TAN**

Frontiers of Computer Science, DOI: [10.1007/s11704-018-8254-y](https://doi.org/10.1007/s11704-018-8254-y)

# Problems & Ideas

- To verify a family of SoC TLM designs:
  - Many combinations of features to form a design
  - Each design is verified one by one
  - Some may be unable to be verified
- Ideas: Should all the features to be considered in verification?
  - Identify mute- future-modules that would be pruned for the given property
  - To reduce the number of designs in a family for the given property to be verified

# Main Contributions

- It is the first time a method is proposed for verifying a family of SoC designs;
- An extended cone-of-influence(COI) method to identify unrelated modules according to the given property;
- An extended formal model is proposed to modeling feature modules in SystemC and the correctness of our method is proven based on it.

## Experimental results

| Property | Memory (MB) |             |             |             | Verification Time (s) |             |             |             |
|----------|-------------|-------------|-------------|-------------|-----------------------|-------------|-------------|-------------|
|          | <i>CPU0</i> | <i>CPU1</i> | <i>CPU2</i> | <i>CPU3</i> | <i>CPU0</i>           | <i>CPU1</i> | <i>CPU2</i> | <i>CPU3</i> |
| P1       | 15.9        | 17.8        | NT          | NT          | 8.2                   | 10.7        | NT          | NT          |
| P2       | 23.1        | 33.2        | /           | NT          | 15.7                  | 28.4        | /           | NT          |
| P3       | /           | /           | 47.3        | NT          | /                     | /           | 35.8        | NT          |
| P4       | 12.7        | 23.3        | 31.8        | NT          | 7.7                   | 18.4        | 29.9        | NT          |
| P5       | /           | /           | 57.8        | NT          | /                     | /           | 50.1        | NT          |
